# Supplementary material for: High Levels of CD244 Rather Than CD160 Associate With CD8+ T-Cell Aging
Source: Frontiers journal article supplement (doi:10.3389/fimmu.2022.853522), 2022-03-21
Supplement: Data_Sheet_1.PDF [file Data_Sheet_1.PDF]

## Supplementary Material

### Supplementary Figures

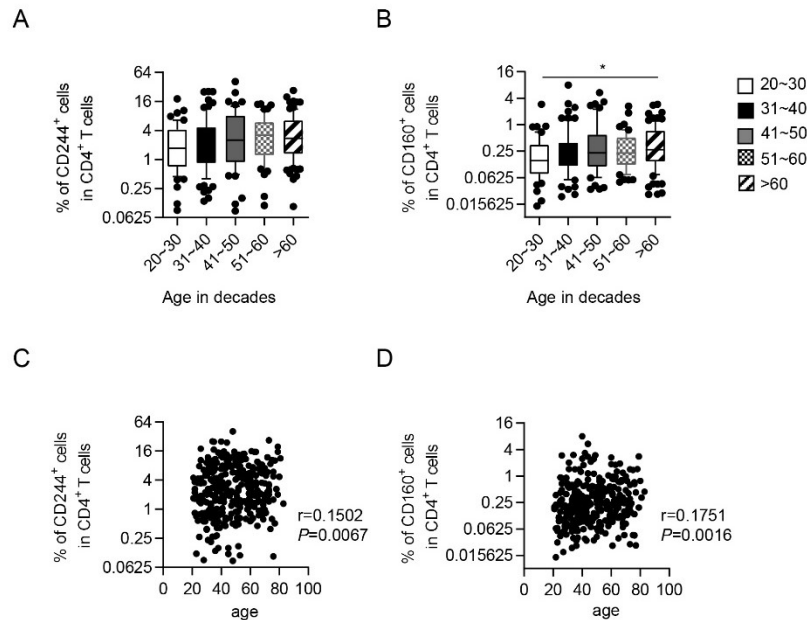

**Supplementary Figure 1. Expression of CD244 and CD160 on CD4<sup>+</sup> T cells of healthy individuals from different age groups**

(A-B) Box plots of the percentage of CD244<sup>+</sup> and CD160<sup>+</sup> cells on CD4<sup>+</sup> T cells from healthy donors in different age groups ( $n = 52-84$  each group).  $P$  values were obtained by Kruskal-Wallis test followed by Dunn's multiple comparisons test. (C-D) Correlation analysis of age and CD244 (C), CD160 (D) expression on CD4<sup>+</sup> T cells from all healthy individuals. Spearman's non-parametric test was used to test for correlations. \* $P < 0.05$ .

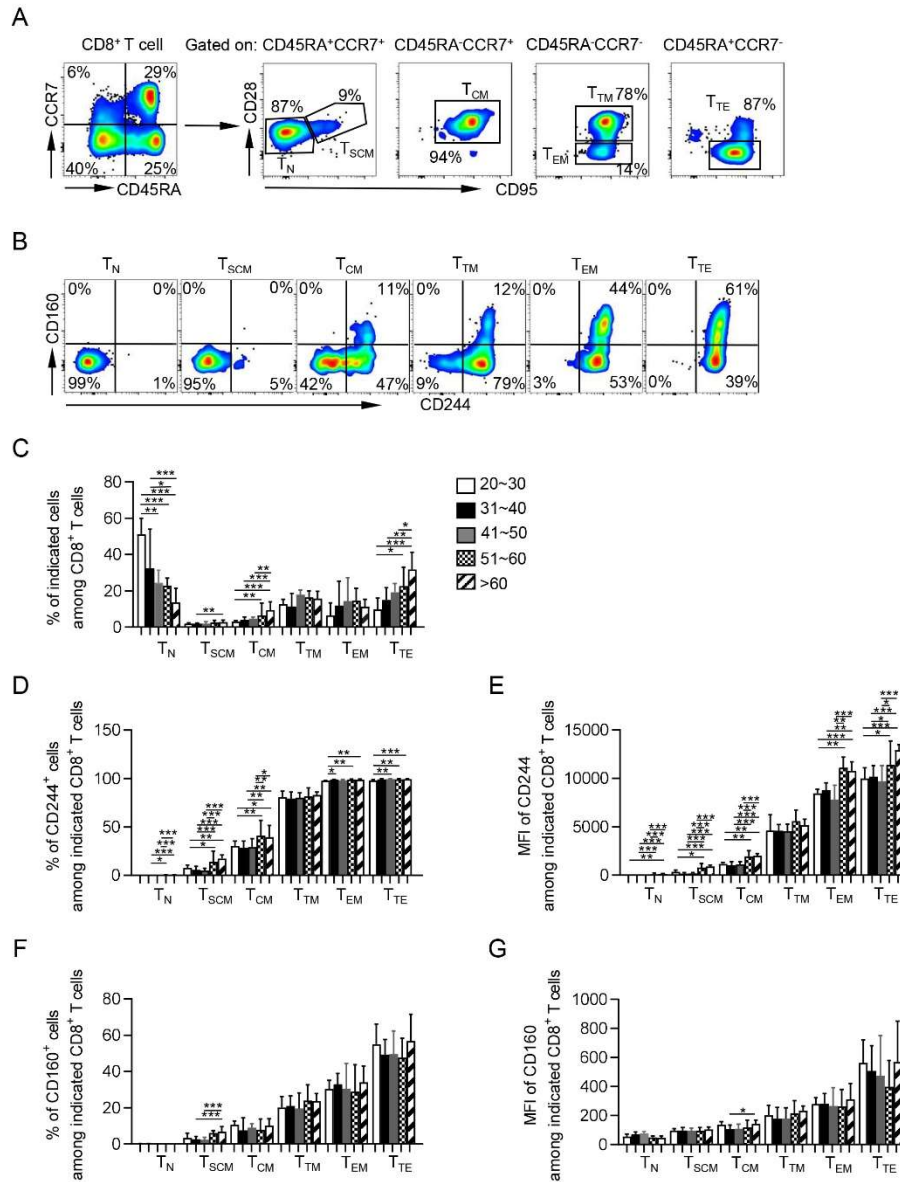

**Supplementary Figure 2. Distribution of CD8<sup>+</sup> T-cell subsets and CD244, CD160 expression on CD8<sup>+</sup> T-cell subsets from different age groups**

(A-B) Gating strategy for CD244 and CD160 expression on each subset (T<sub>N</sub>, T<sub>SCM</sub>, T<sub>CM</sub>, T<sub>TM</sub>, T<sub>EM</sub> and T<sub>TE</sub>) of CD8<sup>+</sup> T cells. (C) Distribution of T<sub>N</sub>, T<sub>SCM</sub>, T<sub>CM</sub>, T<sub>TM</sub>, T<sub>EM</sub> and T<sub>TE</sub> in CD8<sup>+</sup> T cells from different age groups (n = 17-34 each group). *P* values were obtained by Kruskal-Wallis test followed by Dunn's multiple comparisons test (T<sub>N</sub>, T<sub>SCM</sub>, T<sub>CM</sub>, T<sub>TM</sub> and T<sub>EM</sub>) or one-way ANOVA followed by Tukey's multiple comparisons test (T<sub>TE</sub>). (D-E) Expression of CD244 on each subset (T<sub>N</sub>, T<sub>SCM</sub>, T<sub>CM</sub>, T<sub>TM</sub>, T<sub>EM</sub> and T<sub>TE</sub>) of CD8<sup>+</sup> T cells (n = 17-34 each group). *P* values were obtained by Kruskal-Wallis test followed by Dunn's multiple comparisons test (T<sub>N</sub>, T<sub>SCM</sub>, T<sub>TM</sub>, T<sub>EM</sub> and T<sub>TE</sub> in D, T<sub>N</sub>, T<sub>SCM</sub>, T<sub>TM</sub>, and T<sub>EM</sub> in E) or one-way ANOVA followed by Tukey's multiple comparisons test (T<sub>CM</sub> in D, T<sub>CM</sub> and T<sub>TE</sub> in E). (F-G) Expression of CD160 on each subset (T<sub>N</sub>, T<sub>SCM</sub>, T<sub>CM</sub>, T<sub>TM</sub>, T<sub>EM</sub> and T<sub>TE</sub>) of CD8<sup>+</sup> T cells (n = 17-34 each group).

*P* values were obtained by Kruskal-Wallis test followed by Dunn's multiple comparisons test ( $T_N$ ,  $T_{SCM}$ ,  $T_{CM}$  and  $T_{TM}$  in F,  $T_{SCM}$ ,  $T_{TM}$ ,  $T_{EM}$  and  $T_{TE}$  in G) or one-way ANOVA followed by Tukey's multiple comparisons test ( $T_{EM}$  and  $T_{TE}$  in F,  $T_N$  and  $T_{CM}$  in G). \* $P < 0.05$ , \*\* $P < 0.01$ , \*\*\* $P < 0.001$ .

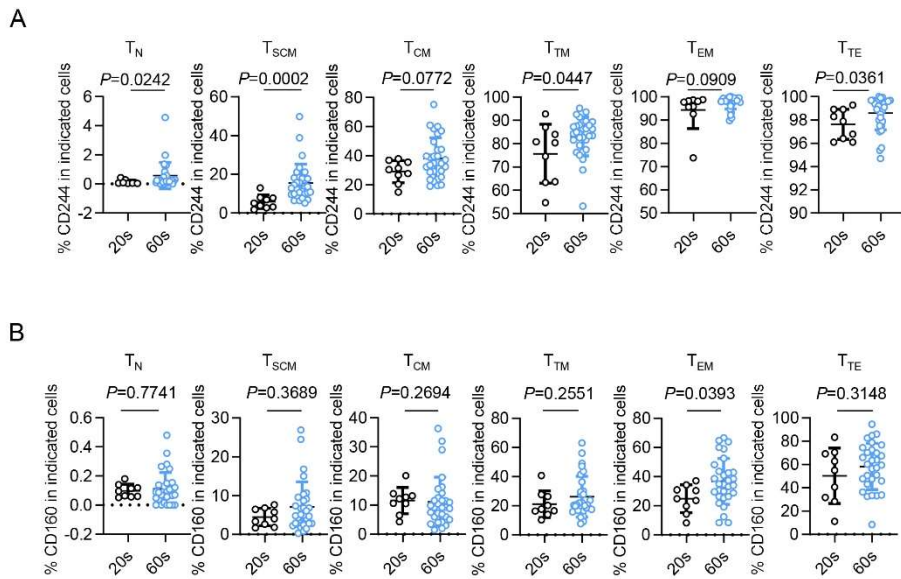

**Supplementary Figure 3. Expression of CD244 and CD160 on CD8<sup>+</sup> T cell subsets from young (20s) and elderly (60s)**

(A-B) Scatter dot plots of the expression of CD244 and CD160 cells on indicated CD8<sup>+</sup> T cell subsets from healthy donors in 20s and 60s (n = 9-30 each group). *P* values were obtained by Mann-Whitney test or Unpaired t test.

## Supplementary Tables

Supplementary Table 1. The sequence of primers for metabolic-related genes.

| Genes   | Forward primer (5'→3')          | Reverse primer (5'→3')        |
|---------|---------------------------------|-------------------------------|
| GLUT1   | 5'-TTGGCTCCGGTATCGTCAAC-3'      | 5'-GCCAGGACCCACTTCAAAGA-3'    |
| HK2     | 5'-GATTTCACCAAGCGTGGACT-3'      | 5'-ACAGGTGCTCTCAAGCCCTA-3'    |
| ENO1    | 5'-TCATCAATGGCGGTTCTCA-3'       | 5'-TTCCCAATAGCAGTCTTCAGC-3'   |
| PDK1    | 5'-CTGTGATACGGATCAGAAACCG-3'    | 5'-TCCACCAAACAATAAAGAGTGCT-3' |
| ATP5G1  | 5'-ACAGCAACTTCCCACTCCAG-3'      | 5'-GCCAAGAATGGCATAGGAGA-3'    |
| mtNd1   | 5'-GGCTATATACAACCTACGCAAAGGC-3' | 5'-GGTAGATGTGGCGGGTTTTAGG-3'  |
| β-actin | 5'-GAGCTACGAGCTGCCTGACG-3'      | 5'-GTAGTTTCGTGGATGCCACAG-3'   |

Supplementary Table 2. Antibody List.

| Reagent                               | Source        | Reference number<br>(Cat#) |
|---------------------------------------|---------------|----------------------------|
| Anti-human CD3-BV786 (SK7)            | BD Pharmingen | 563800                     |
| Anti-human CD4-APC-Fire750<br>(SK3)   | BD Pharmingen | 344638                     |
| Anti-human CD8-BV421 (SK1)            | BD Pharmingen | 740093                     |
| Anti-human CD244-PE-D594 (2-<br>69)   | BD Pharmingen | 564881                     |
| Anti-human CD160-AF488 (BY55)         | BD Pharmingen | 562351                     |
| Anti-human CD98-BUV395<br>(UM7F8)     | BD Pharmingen | 744508                     |
| Anti-human CD45RA-AF700<br>(HI100)    | BD Pharmingen | 560673                     |
| Anti-human CD57-BV421 (NK-1)          | BD Pharmingen | 563896                     |
| Anti-human PD-1-BV711 (EH12.1)        | BD Pharmingen | 564017                     |
| Anti-human TIM-3-BV650 (7D3)          | BD Pharmingen | 565564                     |
| Anti-human Granzyme B-AF700<br>(GB11) | BD Pharmingen | 560213                     |
| Anti-human T-bet-BV421 (O4-46)        | BD Pharmingen | 563318                     |
| Anti-human TNF-α<br>BV711(MAb11)      | BioLegend     | 502943                     |
| Anti-human IL-2-BV650 (MQ1-<br>17H12) | BioLegend     | 500334                     |
| Anti-human CCR7-BV421<br>(G043H7)     | BioLegend     | 353208                     |

|                                         |                          |              |
|-----------------------------------------|--------------------------|--------------|
| Anti-human HLA-DR-AF700 (L243)          | BioLegend                | 307626       |
| Anti-human CD38-BV421 (HB-7)            | BioLegend                | 356618       |
| Anti-human CD28-BV711 (CD28.2)          | BioLegend                | 302948       |
| Anti-human CD27-BV650 (O323)            | BioLegend                | 302828       |
| Anti-human KLRG-1-APC-Fire750 (SA231A2) | BioLegend                | 367718       |
| Anti-human Annexin V-APC                | BioLegend                | 640920       |
| Anti-human Ki67-BV711 (Ki-67)           | BioLegend                | 350516       |
| Anti-human perforin-APC (B-D48)         | BioLegend                | 353312       |
| Anti-human CD71-FITC (CY1G4)            | BioLegend                | 334104       |
| Anti-human CD107a BV421 (H4A3)          | BioLegend                | 328626       |
| Anti-human Eomes-PE-CY7 (WD1928)        | Ebioscience              | 25-4877-42   |
| Fixable Viability Dye eFluor™ 506       | Ebioscience              | 65-0866-14   |
| Anti-human TIGIT-PE-Cy7 (MBSA43)        | Ebioscience              | 25-9500-42   |
| Anti-human LAG-3-APC (3DS223H)          | Ebioscience              | 17-2239-42   |
| Anti-human 2-NBDG                       | Ebioscience              | N13195       |
| Anti-human IFN- $\gamma$ -AF700 (4S.B3) | Ebioscience              | 56-7319-42   |
| Human CD244 (999602)                    | R&D systems              | MAB10393-100 |
| Human CD160 (688327)                    | R&D systems              | MAB6700      |
| Mouse IgG 2B isotype control (688327)   | R&D systems              | MAB004       |
| Cell Event™ Senescence Green            | Thermo Fisher Scientific | C10841       |
